# Supplementary material for: Nestedness Promotes Stability in Maximum-Entropy Bipartite Food Webs
Source: Research Square preprint supplement (doi:10.21203/rs.3.rs-3305252/v1), 2023-08-29
Supplement: Supplementary file 1 [file 102f1ed6aae32fc0000c9379.pdf]

Online Supplement:

Nestedness Promotes Stability in Maximum-Entropy  
Bipartite Food Webs

# S1 Derivation of the MaxEnt Energy Flow Solution for General Topology

The Lagrangian is given by

$$\mathcal{L}(F^*, \kappa, \lambda) = - \sum_{i,j} f_{ij} \ln f_{ij} - \sum_i \kappa_i \left( \sum_j f_{ij} - d_i \right) - \sum_j \lambda_j \left( \sum_i f_{ij} - e_j \right), \quad (\text{S1})$$

where we didn't include the normalization condition eq. (1) as a constraint as it is already implied by the constraints eq. (3a) and eq. (3b).

We now need to solve for

$$\nabla \mathcal{L} = 0. \quad (\text{S2})$$

Note that  $\frac{\partial \mathcal{L}}{\partial \kappa_i} = 0$  and  $\frac{\partial \mathcal{L}}{\partial \lambda_j} = 0$  recover the constraint equations eq. (3a) and eq. (3b). On the other hand,  $\frac{\partial \mathcal{L}}{\partial f_{ij}} = 0$  gives

$$\begin{aligned} -\ln f_{ij} - 1 - \kappa_i - \lambda_j &= 0 \\ f_{ij} &= e^{-\kappa_i - \lambda_j - 1} \\ f_{ij} &= a_i b_j \end{aligned} \quad (\text{S3})$$

where  $a_i \equiv e^{-\kappa_i - \frac{1}{2}} > 0$  and  $b_j \equiv e^{-\lambda_j - \frac{1}{2}} > 0$ .

## S2 Proof That the Linkage Existence Boundary Lies Below the Antidiagonal

Suppose there’s a point on the linkage existence boundary that is above the antidiagonal. Let that point be the intersection of horizontal line  $l_h$  and vertical line  $l_v$ . Then the total flow below  $l_h$  (equal to its distance to the bottom side of the square) is larger than the total flow to the left of  $l_v$  (equal to its distance to the left side of the square), which is impossible since the former is a strict subset of the latter.

## S3 Derivation of the MaxEnt Energy Flow Solution for a Perfectly Nested Topology

Let’s verify that the MaxEnt energy flow formula given in the main text is correct.

Since  $x_{\min}$  only depends on  $i$  and  $y_{\min}$  only depends on  $j$ , we can factorize  $\hat{f}_{ij} = a_i b_j$  where

$$a_i \propto d_i \exp \left( \int_{x_{\min}}^1 \frac{dx}{h(x)} \right) \quad \text{and} \quad b_j \propto e_j \exp \left( \int_{y_{\min}}^1 \frac{dy}{w(y)} \right).$$

It now suffices to verify

$$\sum_{i:(i,j) \in E} \hat{f}_{ij} = e_j \quad \text{and} \quad \sum_{j:(i,j) \in E} \hat{f}_{ij} = d_i.$$

Due to the symmetry between the indices  $i$  and  $j$ , we only need to show the former, and the proof

for the latter would be nearly identical.

Substituting the expression for  $\hat{f}_{ij}$  gives the following statement that we have to verify:

$$\sum_{i:(i,j) \in E} d_i \exp \left( \int_{y_{\min}}^1 \frac{dy}{w(y)} + \int_{x_{\min}}^1 \frac{dx}{h(x)} \right) = 1/C \quad (\text{S4})$$

is constant in  $i$ .

Let’s define  $x_m(y)$  to be the maximum  $x$  such that  $(x, y)$  is in the white region (including the boundary) of the square, and  $y_m(x)$  is similarly defined as the maximum  $y$  such that  $(x, y)$  is in the white region (including the boundary) of the square. Furthermore, for any  $x$  in column  $j$  (excluding its left and right edges),  $h(x) = y_m(x) + x - 1$ ; and for any  $y$  in row  $i$  (excluding its top and bottom edges),  $w(y) = x_m(y) + y - 1$ .

For any  $x$  in column  $j$  (excluding its left and right edges), the left side of eq. (S4) can be rewritten as

$$\int_0^{y_m(x)} \exp \left( \int_{y_m(x)}^1 \frac{dy'}{x_m(y') + y' - 1} + \int_{x_m(y)}^1 \frac{dx'}{y_m(x') + x' - 1} \right) dy$$

or

$$\exp \left( \int_{y_m(x)}^1 \frac{dy}{x_m(y) + y - 1} \right) \int_0^{y_m(x)} \exp \left( \int_{x_m(y)}^1 \frac{dx'}{y_m(x') + x' - 1} \right) dy, \quad (\text{S5})$$

which we wish to show to be independent of  $x$  over all of  $[0, 1]$  except for those points at which  $y_m(x)$  is discontinuous.

To avoid issues that may arise due to these discontinuities, let’s write the linkage existence boundary as a parameterized curve  $(x(t), y(t))$  for  $0 \leq t \leq 1$ , which goes from  $(1, 0)$  in the top-

right corner at  $t = 0$  to  $(0, 1)$  in the bottom-left corner at  $t = 1$ . The parameterization is such that the curve is continuously differentiable everywhere except at the corners, where it is only continuous.

Consider applying integration by parts to the following integral:

$$\begin{aligned} & \int_0^{t_0} (\dot{x}(t) + \dot{y}(t)) \exp \left( \int_t^0 \frac{\dot{x}(t')}{x(t') + y(t') - 1} dt' \right) dt \\ &= (x(t_0) + y(t_0) - 1) \exp \left( \int_{t_0}^0 \frac{\dot{x}(t')}{x(t') + y(t') - 1} dt' \right) \\ & \quad - \int_0^{t_0} (x(t) + y(t) - 1) \exp \left( \int_t^0 \frac{\dot{x}(t')}{x(t') + y(t') - 1} dt' \right) \frac{-\dot{x}(t)}{x(t) + y(t) - 1} dt \\ &= (x(t_0) + y(t_0) - 1) \exp \left( \int_{t_0}^0 \frac{\dot{x}(t)}{x(t) + y(t) - 1} dt \right) + \int_0^{t_0} \dot{x}(t) \exp \left( \int_t^0 \frac{\dot{x}(t')}{x(t') + y(t') - 1} dt' \right) dt. \end{aligned}$$

Moving the integral on the right-hand side to the left side cancels out the  $\dot{x}(t)$  in the integrand on the left-hand side, giving

$$\int_0^{t_0} \dot{y}(t) \exp \left( \int_t^0 \frac{\dot{x}(t')}{x(t') + y(t') - 1} dt \right) dt = (x(t_0) + y(t_0) - 1) \exp \left( \int_{t_0}^0 \frac{\dot{x}(t)}{x(t) + y(t) - 1} dt \right).$$

Therefore, we obtain

$$\begin{aligned} S(t_0) &:= \exp \left( \int_{t_0}^1 \frac{\dot{y}(t)}{x(t) + y(t) - 1} dt \right) \int_0^{t_0} \dot{y}(t) \exp \left( \int_t^0 \frac{\dot{x}(t')}{x(t') + y(t') - 1} dt' \right) dt \\ &= (x(t_0) + y(t_0) - 1) \exp \left( \int_{t_0}^0 \frac{\dot{x}(t)}{x(t) + y(t) - 1} dt + \int_{t_0}^1 \frac{\dot{y}(t)}{x(t) + y(t) - 1} dt \right). \quad (\text{S6}) \end{aligned}$$

Note that  $S(t_0)$  becomes eq. (S5) when we set  $t_0$  to the number such that  $x(t_0) = x$ .

It now suffices to show that  $S(t_0)/S(t_1) = 1$  for any  $0 < t_0, t_1 < 1$ . Indeed,

$$\begin{aligned}
 \frac{S(t_0)}{S(t_1)} &= \frac{x(t_0) + y(t_0) - 1}{x(t_1) + y(t_1) - 1} \exp \left( \int_{t_0}^{t_1} \frac{\dot{x}(t)}{x(t) + y(t) - 1} dt + \int_{t_0}^{t_1} \frac{\dot{y}(t)}{x(t) + y(t) - 1} dt \right) \\
 &= \frac{x(t_0) + y(t_0) - 1}{x(t_1) + y(t_1) - 1} \exp \left( \int_{t_0}^{t_1} \frac{\dot{x}(t) + \dot{y}(t)}{x(t) + y(t) - 1} dt \right) \\
 &= \frac{x(t_0) + y(t_0) - 1}{x(t_1) + y(t_1) - 1} \exp \left( \ln(x(t) + y(t) - 1) \Big|_{t_0}^{t_1} \right) \\
 &= 1,
 \end{aligned}$$

hence completing the proof.

## S4 Details of the Stability Argument

### S4.1 The spectrum and perturbation theory of $\tilde{M}$

#### S4.1.1 Spectrum of $\tilde{M}$

Let's write  $\tilde{M} = \begin{bmatrix} 0 & A \\ B & 0 \end{bmatrix}$  where  $A = -\alpha F$  and  $B = (\eta \odot F)^\top$ .

Let's first look at the relationship between the eigenvalues/eigenvectors of  $AB$  and those of  $BA$ . For any  $\mu \in \mathbb{C}$ , let  $T_\mu$  be the  $\mu$ -eigenspace of  $AB$ , where  $T_\mu = \{0\}$  if  $\mu$  is not an eigenvalue of  $AB$ . Similarly, let  $S_\mu$  be the  $\mu$ -eigenspace of  $BA$ . We notice the following:

- If  $\mu \neq 0$ , then  $ABT_\mu = T_\mu$  and  $BAS_\mu = S_\mu$ . Thus,  $T_\mu$  and  $S_\mu$  are related by  $T_\mu = AS_\mu$  and  $S_\mu = BT_\mu$ , and  $\dim(T_\mu) = \dim(S_\mu)$ . As a result,  $\mu$  is an eigenvalue of  $AB$  iff it is an

eigenvalue of  $BA$ .

- If  $\mu = 0$ , then  $T_0$  is just the kernel of  $AB$  and  $S_0$  is the kernel of  $BA$ .

Now,  $\tilde{M}^2 = \begin{bmatrix} AB & 0 \\ 0 & BA \end{bmatrix}$ , whose  $\mu$ -eigenspace is just  $T_\mu \oplus S_\mu$ .

- For a nonzero eigenvalue  $\mu$  of  $\tilde{M}^2$ , the possible corresponding eigenvalues of  $\tilde{M}$  are  $\lambda = \pm\sqrt{\mu}$  and the corresponding eigenvectors take the form  $v \oplus u$  where  $v \in T_\mu$  and  $u \in S_\mu$ .  
Now, writing  $\tilde{M}(v \oplus u) = \lambda(v \oplus u)$  gives  $Au = \lambda v$  and  $Bv = \lambda u$ , so the eigenspace of  $\tilde{M}$  corresponding to an eigenvalue  $\lambda = \pm\sqrt{\mu} \neq 0$  is  $\{(\lambda v) \oplus (Bv) : v \in T_\mu\}$ .
- For an eigenvalue  $\mu = 0$  of  $\tilde{M}^2$  (if one exists), the corresponding eigenvalue of  $\tilde{M}$  is  $\lambda = \pm\sqrt{\mu} = 0$  and the corresponding eigenvectors take the form  $v \oplus u$  where  $v$  is in the kernel of  $B$  and  $u$  is in the kernel of  $A$ .

#### S4.1.2 Perturbation theory of $\tilde{M}$

(Note: Every square matrix in this section is assumed to be diagonalizable.)

Consider adding to  $\tilde{M}$  a random perturbation  $X$  whose entries are i.i.d. normal with mean 0 and variance  $\sigma^2$  that is small. This perturbs the eigenvalues  $\tilde{\lambda}_i$  of  $\tilde{M}$  such that they become  $\lambda'_i = \tilde{\lambda}_i + \delta\tilde{\lambda}_i$ . Let's derive a formula for  $\delta\tilde{\lambda}_i$  to first order in  $X$  to show that the mean is 0 and, when the entries of  $\eta$  are constant, the joint distribution is independent of  $F$  when all its singular values are distinct and positive.

For an eigenvalue  $\tilde{\lambda}$  of  $\tilde{M}$  with multiplicity  $m \geq 1$ , let  $\tilde{v}_1, \tilde{v}_2, \dots, \tilde{v}_m$  be a basis for its eigenspace  $D_{\tilde{\lambda}}$ . Since  $\tilde{M}$  and  $\tilde{M}^\top$  have the same characteristic polynomial,  $\tilde{M}$  also has a left

76 eigenspace  $E_{\tilde{\lambda}}^*$  spanned by  $\tilde{w}_1^\dagger, \tilde{w}_2^\dagger, \dots, \tilde{w}_m^\dagger$ , corresponding to eigenvalue  $\tilde{\lambda}$ .

77 Under the perturbation  $X$ , the perturbed eigenvectors can be decomposed as  $\tilde{v}'_i + \delta\tilde{v}_i$ , where

78  $\tilde{v}'_i \in D_{\tilde{\lambda}}$  and  $\delta\tilde{v}_i \perp E_{\tilde{\lambda}}$ .<sup>1</sup> The deviations  $\delta\tilde{v}_i$  from the eigenspace can be considered to be small, so

$$\begin{aligned} (\tilde{M} + X)(\tilde{v}'_i + \delta\tilde{v}_i) &= (\tilde{\lambda}_i + \delta\tilde{\lambda}_i)(\tilde{v}'_i + \delta\tilde{v}_i) \\ \tilde{M} \delta\tilde{v}_i + X\tilde{v}'_i &= \tilde{\lambda}_i \delta\tilde{v}_i + (\delta\tilde{\lambda}_i)\tilde{v}'_i, \end{aligned} \quad (\text{S7})$$

79 where second-order terms have been neglected. Multiplying both sides of eq. (S7) by  $\tilde{w}_j^\dagger$  from the

80 left gives

$$\begin{aligned} \tilde{\lambda} \tilde{w}_j^\dagger \delta\tilde{v}_i + \tilde{w}_j^\dagger X \tilde{v}'_i &= \tilde{\lambda} \tilde{w}_j^\dagger \delta\tilde{v}_i + \tilde{w}_j^\dagger (\delta\tilde{\lambda}) \tilde{v}'_i \\ \tilde{w}_j^\dagger X \tilde{v}'_i &= \tilde{w}_j^\dagger \tilde{v}'_i (\delta\tilde{\lambda}). \end{aligned} \quad (\text{S8})$$

81 Let's define the matrices

$$W = \begin{bmatrix} w_1 & w_2 & \dots & w_m \end{bmatrix} \quad V = \begin{bmatrix} v_1 & v_2 & \dots & v_m \end{bmatrix} \quad VV' = \begin{bmatrix} v'_1 & v'_2 & \dots & v'_m \end{bmatrix},$$

82 where column  $i$  of  $V'$  is just the coefficients of writing  $v'_i$  as a linear combination of the  $v_j$ . Also,

---

<sup>1</sup>Here, we have assumed that  $D_{\tilde{\lambda}} \oplus E_{\tilde{\lambda}}^\perp = V$ , where  $V = \mathbb{C}^{S_R+S_C}$  is the entire vector space. This assumption should generally hold since  $\dim D_{\tilde{\lambda}} = m$  and  $\dim E_{\tilde{\lambda}}^\perp = S_R + S_C - \dim E_{\tilde{\lambda}} = S_R + S_C - m$ . Also, we know that it holds for Hermitian matrices where  $D_{\tilde{\lambda}} = E_{\tilde{\lambda}}$ .



83 define the diagonal matrix  $\delta\Lambda = \text{diag}(\delta\tilde{\lambda}_1, \delta\tilde{\lambda}_2, \dots, \delta\tilde{\lambda}_m)$ . Then eq. (S8) can be rewritten as

$$\begin{aligned} W^\dagger X V V' &= W^\dagger V V' \delta\Lambda \\ (W^\dagger V)^{-1} W^\dagger X V &= V' \delta\Lambda V'^{-1} \end{aligned} \quad (\text{S9})$$

84 Thus, the problem becomes diagonalizing the matrix on the left-hand side of eq. (S9), and the  
85 resultant eigenvalues will be the perturbations to the original degenerate eigenvalue  $\tilde{\lambda}$ .

86 When  $\tilde{M}$  is Hermitian, we can choose  $W$  and  $V$  to be equal unitary matrices and eq. (S9)  
87 becomes the first-order perturbation theory result from quantum mechanics.

88 Let’s now study the distribution of the eigenvalue perturbations  $\delta\tilde{\lambda}_i$ . If we uniformly choose  
89 from  $\{\delta\tilde{\lambda}_1, \delta\tilde{\lambda}_2, \dots, \delta\tilde{\lambda}_m\}$  at random,<sup>2</sup> then the expected value is  $\frac{1}{m}\mathbb{E}[\text{tr}(\delta\Lambda)] = \frac{1}{m}\mathbb{E}[\text{tr}((W^\dagger V)^{-1} W^\dagger X V)] =$   
90 0. The last step used the fact that every entry of  $(W^\dagger V)^{-1} W^\dagger X V$  is a linear combination of entries  
91 of  $X$ , all of which have zero mean.

92 Now, consider the case where all singular values of  $F$  are distinct and positive. This is true  
93 almost surely when  $F$  is chosen to be the MaxEnt solution with random perturbations added to  
94 its entries to model deviations from the MaxEnt solution. Assume also that the entries of  $\eta$  are  
95 constant. WLOG, let them all be 1. Then  $\tilde{M} = \begin{bmatrix} 0 & -\alpha F \\ \beta F^\top & 0 \end{bmatrix}$ . According to section S4.1.1, the  
96 nonzero eigenvalues are the  $\pm$  square roots of the nonzero eigenvalues of  $-\alpha\beta F F^\top$  (or, equiva-  
97 lently,  $-\alpha\beta F^\top F$ ). Therefore, there are  $2 \min(S_R, S_C)$  nonzero eigenvalues of the form  $\pm i\sqrt{\alpha\beta}\sigma_k$   
98 where  $\sigma_k$  are the  $\min(S_R, S_C)$  singular values of  $F$ , and the remaining  $|S_R - S_C|$  eigenvalues are

<sup>2</sup>This is the most reasonable thing to do when asking the question “What’s the perturbation to eigenvalue  $\tilde{\lambda}$ ?” when the eigenvalue is degenerate. Any other interpretation such as asking about the smallest value among the eigenvalue perturbations would break the symmetry of the degeneracy.

99 zero.

100 WLOG, suppose  $S_R \geq S_C$ . Write the SVD of  $F$  as  $F = \sum_{k=1}^{S_C} \sigma_k v_k u_k^\top$ . By section S4.1.1,  
 101 the eigenvectors of  $\tilde{M}$  corresponding to singular value  $\sigma_k$  of  $F$  are  $(\pm i\sqrt{\alpha\beta}\sigma_k v_k) \oplus \beta F^\top v_k =$   
 102  $(\pm i\sqrt{\alpha\beta}\sigma_k v_k) \oplus (\beta\sigma_k u_k)$ . Let’s scale it to  $(\pm i\sqrt{\alpha}v_k) \oplus (\sqrt{\beta}u_k)$  for simplicity. Similarly, we can  
 103 obtain the corresponding left eigenvectors:  $(\mp i\sqrt{\beta}v_k^\top) \oplus (\sqrt{\alpha}u_k^\top)$ . Finally, if  $v_{S_C+1}, \dots, v_{S_R}$  is a  
 104 basis of the nullspace of  $F^\top$ , then  $v_k \oplus 0$  ( $S_C + 1 \leq k \leq S_R$ ) form a basis of the nullspace of  $\tilde{M}$ .

105 Consider the orthonormal basis consisting of the vectors  $v_k \oplus 0$  ( $1 \leq k \leq S_R$ ) and  $0 \oplus u_k$   
 106 ( $1 \leq k \leq S_C$ ). In this basis, the eigenspaces of  $\tilde{M}$  are solely a function of  $\alpha$  and  $\beta$ : the dependence  
 107 on the entries of  $F$  has been absorbed into the change of basis. Therefore, if we always work in this  
 108 basis constructed from the left and right singular vectors of  $F$ , then the set of  $V$  and  $W$  matrices  
 109 for the eigenspaces and left eigenspaces of  $\tilde{M}$  will be independent of  $F$ . Thus, the distribution of  
 110 eigenvalue perturbations given by eq. (S9) will be independent of  $F$  as long as the distribution of  
 111 the perturbation matrix  $X$  is invariant under the change of basis. Indeed, since the new basis is  
 112 orthonormal, the change-of-basis matrix  $B$  is orthogonal. Then  $(B^\top X B)_{i,j} = \sum_{k,l} B_{ki} B_{lj} X_{kl}$  is  
 113 distributed normally with mean 0 and

$$\begin{aligned} \text{Cov}((B^\top X B)_{i,j}, (B^\top X B)_{i',j'}) &= \sum_{k,l,k',l'} B_{ki} B_{lj} B_{k'i'} B_{l'j'} \text{Cov}(X_{kl}, X_{k'l'}) \\ &= \sum_{k,l} B_{ki} B_{lj} B_{ki'} B_{lj'} \sigma^2 \\ &= \delta_{ii'} \delta_{jj'} \sigma^2. \end{aligned}$$

114 So  $B^\top X B$  is a random matrix with i.i.d. normal random variables with mean 0 and variance  $\sigma^2$ ,

just like  $X$ . This completes the proof that the first-order perturbations to the eigenvalues of  $\tilde{M}$  are independent of  $F$  when the entries of  $\eta$  are equal and the singular values of  $F$  are distinct and positive.

## *S4.2 Perfectly-nested non-singular $F$ : $F^\top F$ has larger eigenvalues that are less spread out when $N_p$ is high*

Let’s treat off-diagonal elements of  $F^\top F$  as a perturbation  $\delta A$  to the diagonal part  $A$  of  $F^\top F$ . Note that both  $A$  and  $\delta A$  are symmetric matrices, so that we can directly cite perturbation theory results from quantum mechanics, which apply to Hermitian matrices.

The eigenvalues of  $A$  are just the elements on the diagonal,  $a_{ii} = \vec{f}_i \cdot \vec{f}_i$ . When  $N_p$  is high, the variance of the components of  $f_i$  is high, i.e., the mean of the squares of the components of  $f_i$  is high (the square of the mean of the components is a constant  $1/S_R^2$ ). Thus,  $\vec{f}_i \cdot \vec{f}_i$  is high, thus showing that the eigenvalues of  $A$  are larger for larger  $N_p$ .

Let’s now look how the perturbation  $\delta A$  changes the eigenvalues.

For a non-degenerate eigenvalue  $a_{ii}$  corresponding to the unit eigenvector  $e_i$ , the first-order perturbation to the eigenvalue is  $\delta A_{ii}$  and the second-order perturbation is

$$\sum_{j \neq i} \frac{\delta A_{ij}^2}{a_{ii} - a_{jj}}. \quad (\text{S10})$$

Each individual term in the sum is positive when  $a_{ii} > a_{jj}$  and negative otherwise, meaning that eigenvalues smaller than  $a_{ii}$  push it upwards and eigenvalues larger than  $a_{ii}$  push it downwards, a

phenomenon known as *level repulsion* in quantum mechanics. The effect of level repulsion spreads the eigenvalues out, with the effect greater when the perturbation is larger, i.e., when  $N_p$  is smaller.

For a degenerate or near-degenerate eigenspace spanned by unit eigenvectors  $e_i$  for  $i \in I$ , computing the second-order perturbation according to the formula above gives values that explode. This is interpreted as a nonzero first-order perturbation, which can be calculated using degenerate perturbation theory. The result is that the first order perturbations to  $a_{ii}$  for  $i \in I$  are given by the eigenvalues of the symmetric matrix  $\widetilde{\delta A} = (\delta A_{ij})_{i,j \in I}$ . The sum of these eigenvalues is  $\text{tr}(\widetilde{\delta A}) = 0$ , whereas the sum of the squares of the eigenvalues is  $\text{tr}(\widetilde{\delta A}^2) = \sum_{i,j \in I} \delta A_{ij}^2$ . Thus, the original degenerate eigenvalues  $a_{ii}$  ( $i \in I$ ) of  $A$  are now split (known as *level splitting* in quantum mechanics), and the spread of the resulting eigenvalues is greater when the entries of  $\widetilde{\delta A}$  are greater, i.e., when  $N_p$  is smaller.

### S4.3 Case where some consumers share the same set of resources

Since the eigenvalues of  $F^\top F$  are the squares of the singular values of  $F$ , let’s study those instead. Treating the random deviation from the MaxEnt matrix as a perturbation, i.e.,  $F = \overline{F} + \Delta F$ , the zeros among the singular values of  $\overline{F}$  become the singular values of  $\widetilde{\Delta F}$ , defined as  $\Delta F$  with its domain restricted to the nullspace of  $\overline{F}$  and image projected onto the left nullspace of  $\overline{F}$  (see below). This is an  $(S_R - S) \times (S_C - S)$  random matrix where  $S$  is the rank of  $F$ . If the entries of this random matrix are i.i.d. normal with variance  $\sigma^2$ , then according to the Marchenko-Pastur

distribution, the smallest singular value is approximately

$$\sigma \left| \sqrt{S_R - S} - \sqrt{S_C - S} \right| = \sigma \frac{|S_R - S_C|}{\sqrt{S_R - S} + \sqrt{S_C - S}} \quad (\text{S11})$$

for large  $S_R - S, S_C - S$ . The smallest singular value of  $\widetilde{\Delta F}$  is larger when  $S$  is larger, i.e., when the topology is more nested according to  $N_p$ . In this case, the smallest singular value of  $F$  is also larger, translating to the smallest eigenvalues of  $F^\top F$  being larger, hence increasing stability.

*Derivation of the perturbation to the zero singular values of a matrix.* Write the SVD of  $\overline{F}$  as  $\overline{F} = \sum_k \sigma_k U_k V_k^*$  where  $\sigma_k$  are the *distinct* singular values with multiplicities  $d_k$ ,  $U = \begin{bmatrix} U_1 & U_2 & \dots & U_k \end{bmatrix}$  is unitary, and  $V = \begin{bmatrix} V_1 & V_2 & \dots & V_k \end{bmatrix}$  is unitary. Write the SVD of the perturbed matrix  $F$  as

$$\overline{F} + \Delta F = \sum_k (U_k + \Delta U_k) \tilde{U}_k (\sigma_k I_{d_k} + \Delta \Sigma_k) \tilde{V}_k^* (V_k + \Delta V_k)^*, \quad (\text{S12})$$

where  $\Delta \Sigma_k$  is diagonal,  $\tilde{U}_k, \tilde{V}_k \in \text{U}(d_k)$ ,  $\tilde{U}_k \tilde{V}_k^* \approx I_{d_k}$  to first order (unless  $\sigma_k = 0$ ),  $U_k^* \Delta U_k \approx 0$  to first order and  $V_k^* \Delta V_k \approx 0$  to first order. To first order, eq. (S12) can be rewritten as

$$\Delta F \approx \sum_k \left( \sigma_k (\Delta U_k) V_k^* + \sigma_k U_k (\Delta V_k)^* + \sigma_k U_k (\tilde{U}_k \tilde{V}_k^* - I_{d_k}) V_k^* + U_k \tilde{U}_k (\Delta \Sigma_k) \tilde{V}_k^* V_k^* \right). \quad (\text{S13})$$

To obtain the singular value perturbations  $\Delta \Sigma_{k_0}$ , we multiply from the left by  $U_{k_0}^*$  and from the right by  $V_{k_0}$  to obtain

$$U_{k_0}^* (\Delta F) V_{k_0} \approx \sigma_{k_0} (\tilde{U}_{k_0} \tilde{V}_{k_0}^* - I_{d_{k_0}}) + \tilde{U}_{k_0} (\Delta \Sigma_k) \tilde{V}_{k_0}^*. \quad (\text{S14})$$

161 If  $\sigma_{k_0} = 0$ , then this becomes

$$U_{k_0}^* (\Delta F) V_{k_0} \approx \tilde{U}_{k_0} (\Delta \Sigma_k) \tilde{V}_{k_0}^*, \quad (\text{S15})$$

162 as desired.

## 163 **S5 Comparison with Existing Nestedness Metrics**

164 Here, we study the correlation between nestedness and instability using the following 4 metrics of  
165 nestedness and 2 metrics of instability.

166 *4 metrics of nestedness:*

- 167 • The *matrix dipole moment*  $N_p$ , as defined in the main text.
- 168 • *Nestedness by overlap and decreasing fill* NODF<sup>1</sup>.
- 169 • The nestedness metric  $N_T = 1 - T/100$ , where  $T$  is the *matrix temperature*.  $T$  was defined  
170 first in<sup>2</sup>, but the definition was ambiguous, so we implement  $T$  based on BINMATNEST<sup>3</sup>.
- 171 • The nestedness metric  $N_d = 1 - 4d/S_R S_C$ , where  $d$  is the *nestedness discrepancy*<sup>4</sup>. Equiv-  
172 alently, this is  $N_d = 1 - d_0$  where  $d_0$  is a normalized version of discrepancy introduced  
173 by<sup>5</sup>.

174 To reduce computational costs, the algorithm for finding the maximally packed configuration is by  
175 simply ordering the species in decreasing degree.

176 *2 metrics of instability:*

•  $\bar{m}$ , as defined in the main text.

•  $p_{m>0}$ , the proportion of  $m$  values that are positive among the  $\tilde{M}$  matrices samples for a given topology.

For each pair  $S_R, S_C$  with  $3 \leq S_R, S_C \leq 50$ , we sampled 250 topologies with a roughly equal number of topologies for each  $s$  from 0 up to  $0.4S_RS_C$ . For each topology, 250  $\tilde{M}$  matrices were sampled, from which the instability metrics  $\bar{m}$  and  $p_{m>0}$  were calculated. A linear regression was performed between each of the two instability metrics and each of the four nestedness metrics, and the resultant  $r$ -values are plotted on a heat map for each  $(S_R, S_C)$  pair (fig. S1).

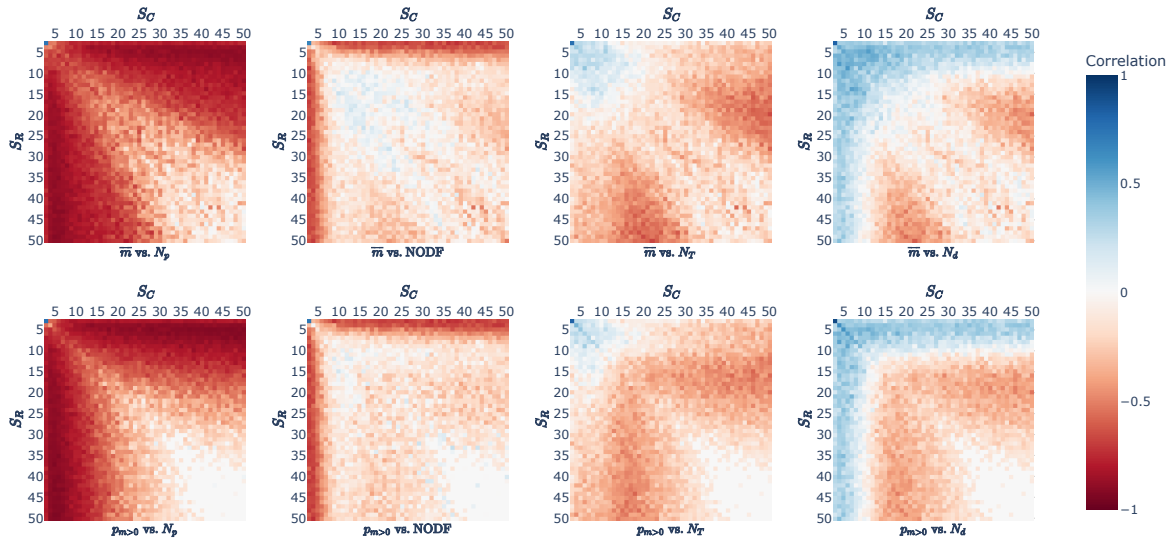

Figure S1: Correlation between instability and nestedness for each  $(S_R, S_C)$  pair with  $3 \leq S_R, S_C \leq 50$  for each instability metric ( $\bar{m}$ ,  $p_{m>0}$ ) for each nestedness metric ( $N_p$ , NODF,  $N_T$ ,  $N_d$ ).

We notice significant negative correlation regardless of the instability metric or nestedness metric used, as long as  $S_R$  and  $S_C$  are not too close to each other and are sufficiently large. In addition, we notice that the negative correlation is present even when  $S_R$  or  $S_C$  are small if we use

188 the  $N_p$  or NODF metrics, as long as  $(S_R, S_C) \neq (3, 3)$ . As expected, the negative correlations are  
189 the strongest for  $N_p$ .



## References

- [1] Almeida-Neto, M., Guimaraes, P., Guimaraes Jr, P. R., Loyola, R. D. & Ulrich, W. A consistent metric for nestedness analysis in ecological systems: reconciling concept and measurement. *Oikos* **117**, 1227–1239 (2008).
- [2] Atmar, W. & Patterson, B. D. The measure of order and disorder in the distribution of species in fragmented habitat. *Oecologia* **96**, 373–382 (1993).
- [3] Rodríguez-Gironés, M. A. & Santamaría, L. A new algorithm to calculate the nestedness temperature of presence-absence matrices. *Journal of biogeography* **33**, 924–935 (2006).
- [4] Brualdi, R. A. & Sanderson, J. G. Nested species subsets, gaps, and discrepancy. *Oecologia* **119**, 256–264 (1999).
- [5] Greve, M. & L. Chown, S. Endemicity biases nestedness metrics: a demonstration, explanation and solution. *Ecography* **29**, 347–356 (2006).
- [6] Cross, W. F. *et al.* Ecosystem ecology meets adaptive management: Food web response to a controlled flood on the Colorado River, Glen Canyon. *Ecological Applications* **21**, 2016–2033 (2011).
- [7] Bumpers, P. M., Rosemond, A. D., Maerz, J. C. & Benstead, J. P. Experimental nutrient enrichment of forest streams increases energy flow to predators along greener food-web pathways. *Freshwater Biology* **62**, 1794–1805 (2017).

- [8] de la Morinière, E. C. *et al.* Ontogenetic dietary changes of coral reef fishes in the mangrove-seagrass-reef continuum: stable isotopes and gut-content analysis. *Marine Ecology Progress Series* **246**, 279–289 (2003).
- [9] Rudnick, D. & Resh, V. Stable isotopes, mesocosms and gut content analysis demonstrate trophic differences in two invasive decapod crustacea. *Freshwater Biology* **50**, 1323–1336 (2005).
- [10] Judas, M. Gut content analysis of earthworms (Lumbricidae) in a beechwood. *Soil Biology and Biochemistry* **24**, 1413–1417 (1992).
- [11] Baird, D. & Ulanowicz, R. E. The seasonal dynamics of the Chesapeake Bay ecosystem. *Ecological Monographs* **59**, 329–364 (1989).
- [12] Goldwasser, L. & Roughgarden, J. Construction and analysis of a large Caribbean food web. *Ecology* **74**, 1216–1233 (1993).
- [13] Christian, R. R. & Luczkovich, J. J. Organizing and understanding a winter’s seagrass food-web network through effective trophic levels. *Ecological Modelling* **117**, 99–124 (1999).

## Supplementary Tables

Table S1: Information regarding the food web networks involved in the empirical data analysis. For the “Resources” and “Consumers” columns, the format for each cell is [# of species]: [list of species separated by commas].

| Reference | Ecosystem type              | Resources                                                                                                                                                                                   | Consumers                                                                                                                 | Total # linkages | Topologically nested? |
|-----------|-----------------------------|---------------------------------------------------------------------------------------------------------------------------------------------------------------------------------------------|---------------------------------------------------------------------------------------------------------------------------|------------------|-----------------------|
| 6         | Riparian                    | 6: Amorphous detritus, Diatoms, Leaves, Filamentous algae, Macrophytes, Fungi                                                                                                               | 8: Potamopyrgus antipodarum, Gammarus lacustris, Tubificida (a), Physidae, Lumbricidae, Chironomidae, Simuliidae, Other * | 40               | Yes                   |
| 7         | Forest streams              | 14: Elmidae, Copepoda, Ceratopogonidae, Hexatoma, Diptera (non-Tanypodinae), Tanypodinae, Maccaffertium, Paraleptophlebia, Serratella, Amphinemura, Isoperla, Leuctra, Talaperla, Wormaldia | 2: Desmognathus quadramaculatus, Eurycea wilderae                                                                         | 28               | Yes                   |
| 8         | Mangrove; sea-grass bed     | 12: Tanaidacea, Copepoda, Isopoda, Amphipoda, Mysideacea, Bivalvia, Gastropoda, Decapoda, Fish, Sediment, Other †, Unidentified                                                             | 5: Haemulon flavolineatum, Haemulon sciurus, Lutjanus apodus, Lutjanus griseus, Ocyurus chrysurus                         | 41               | No                    |
|           | Coral reef                  | 4: Decapoda, Fish, Sediment, Unidentified                                                                                                                                                   |                                                                                                                           | 13               | No                    |
| 9         | Freshwater tributary        | 4: Detritus, Algae, Invertebrates, Inorganic matter                                                                                                                                         | 2: Chinese mitten crab, Red swamp crayfish                                                                                | 8                | Yes                   |
| 10        | Beech wood                  | 2: Inorganic matter, Non-particulate organic matter                                                                                                                                         | 6: L. terrestris, L. castaneus, Aporectodea caliginosa, Aporectodea rosea, O. lacteum, O. cyaneum                         | 12               | Yes                   |
| 11        | Estuary (mesohaline)        | 2: Bay anchovy, Menhaden                                                                                                                                                                    | 3: Blue fish, Summer flounder, Striped bass                                                                               | 6                | Yes                   |
| 12        | Tropical island             | 2: Coleoptera adult, Adult spider                                                                                                                                                           | 2: Hummingbirds, Elaenia                                                                                                  | 4                | Yes                   |
|           |                             | 3: Coleoptera larva, Diptera larva, Ants                                                                                                                                                    | 4: Bullfinch, Coleoptera adult, Centipede, Orthoptera                                                                     | 11               | Yes                   |
|           |                             | 2: Collembola, Mites                                                                                                                                                                        | 4: Coleoptera larva, Diptera larva, Ants, Thysanoptera                                                                    | 8                | Yes                   |
|           |                             | 2: Detritus, Fungi                                                                                                                                                                          | 2: Collembola, Mites                                                                                                      | 4                | Yes                   |
|           |                             | 2: Wood, Detritus                                                                                                                                                                           | 2: Coleoptera larva, Isoptera                                                                                             | 4                | Yes                   |
| 13        | Halodule wrightii community | 3: Meiofauna, Benthic algae, Detritus                                                                                                                                                       | 4: Brittle stars, Deposit-feeding peracaridan crustaceans, Deposit-feeding gastropods, Deposit-feeding polychaetes        | 11               | Yes                   |
|           |                             | 6: Meiofauna, Epiphyte-grazing amphipods, Deposit-feeding peracaridan crustaceans, Zooplankton, Macroepiphytes, Benthic algae, Detritus                                                     | 4: Sheepshead minnow, Killifishes, Gobies and blennies, Pipefish and seahorses                                            | 20               | No                    |

\* Ostracoda, Nematoda, Sphaeriidae, Cladocera, Copepoda, Tubificida (b)

† Oligochaeta, Polychaeta, Echinoidea, Ostracoda, Seagrass, Foraminifera, Filamentous algae, Calcareous algae, Macroalgae
